# Supplementary material for: Monitor to Innovate With Feedback Loops: Process Evaluation Protocol for an Anemia Prevention Intervention&nbsp;
Source: Research Square preprint supplement (doi:10.21203/rs.3.rs-389608/v1), 2021-04-07
Supplement: Supplementary file 1 [file e0ac628730debd5a34091d09.docx]

**Additional File 2**

Appendix 2: Qualitative Interview Guide

**Quality of Sessions**

How do you feel that that the sessions are going overall? (examples: improved knowledge about anemia/IFA, learning about iron rich foods, etc.)

**Session improvement**

What do you think would make these sessions more successful? (examples: Is the duration of the session too long or too short? Are the issues covered too complicated or too simple for the audiences?)

**Session logistics**

Are the sessions being conducted in a comfortable location with adequate space? Is there a better venue or time where the session can be conducted in the future?

**Community Facilitators Performance**

How do you feel about the Community facilitation during the session? (For example: What would make it easier for them to facilitate? Do they need further support for them to conduct these sessions better?

**Number and quality of conversations about IFA/anemia/any study related outcome**

From your discussions with the participants, can you tell me about a conversation that they have had with their friends or family about iron boutika after a T4 or community engagement session? Do you think that conversations are happening regularly? Why or why not?

**Audience reach**

How can we engage more people? Do you feel like we are reaching a diverse group of people? Why/why not? (e.g. different castes, tribes, ages, etc.):

**Facilitators**

Who have emerged as the key facilitators to our work in the villages? Who can be a great ally to taking this message forward in the village? Which stakeholders can/wants to play a greater role?

**Barriers/Unintended consequences**

Is there anything that I did not ask that you would like to tell me about how things are going? Are there any unintended consequences of our work? Are there any groups/individuals/issues which are acting as barriers to the sessions and project work?
